# Supplementary material for: Association between osteoporosis and the rate of telomere shortening
Source: publisher site journal article supplement (doi:10.18632/aging.206034), 2024-07-25
Supplement: Supplementary file [file aging-v16i14-206034-supplementary-material-SD1.pdf]

## SUPPLEMENTARY TABLE

**Supplementary Table 1. Characteristics of the study subjects according to sex.**

| <b>Characteristics</b>                      | <b>Male</b>    | <b>Female</b>  | <b>Total</b>   | <b>p</b> |
|---------------------------------------------|----------------|----------------|----------------|----------|
| Number (%)                                  | 92 (39.5)      | 141 (60.5)     | 233            |          |
| Age, mean $\pm$ SD, y                       | 71.0 $\pm$ 7.5 | 69.7 $\pm$ 8.7 | 70.2 $\pm$ 8.3 | 0.242    |
| LTL at baseline, mean $\pm$ SD, kbp         | 7.6 $\pm$ 1.7  | 8.1 $\pm$ 2.2  | 7.9 $\pm$ 2.0  | 0.044    |
| LTL at baseline, median (IQR), kbp          | 7.1 (6.6–8.0)  | 7.3 (6.8–8.6)  | 7.2 (6.7–8.2)  | 0.044    |
| LTL at 2-year follow-up, mean $\pm$ SD, kbp | 6.7 $\pm$ 0.8  | 6.8 $\pm$ 1.0  | 6.7 $\pm$ 0.9  | 0.380    |
| LTL at 2-year follow-up, median (IQR), kbp  | 6.6 (6.2–7.4)  | 6.6 (6.0–7.4)  | 6.6 (6.1–7.4)  | 0.380    |

IQR, interquartile range; LTL, leukocyte telomere length; SD, standard deviation.
